# Supplementary material
Source: ML conference proceedings conference paper supplement (https://proceedings.mlr.press/v70/li17c.html)
Supplement: Supplementary file 1 [file li17c-supp.pdf]

## Supplementary for Provably Optimal Algorithms for Generalized Linear Contextual Bandits

### A. Proof of Theorem 1

In the following, for simplicity, we will drop the subscript  $n$  when there is no ambiguity. Therefore,  $V_n$  is denoted  $V$  and so on.

To prove normality-type results of the maximum likelihood estimator  $\hat{\theta}$ , typically we first show the  $n^{-1/2}$ -consistency of  $\hat{\theta}$  to  $\theta^*$ . Then, by using a second-order Taylor expansion or Newton-step, we can prove the desired normality of  $\hat{\theta}$ . More details can be found in standard textbooks such as [Van der Vaart \(2000\)](#).

Since  $m$  is twice differentiable with  $\ddot{m} \geq 0$ , the maximum-likelihood estimation can be written as the solution to the following equation

$$\sum_{i=1}^n (Y_i - \mu(X_i' \theta)) X_i = 0. \quad (15)$$

Define  $G(\theta) := \sum_{i=1}^n (\mu(X_i' \theta) - \mu(X_i' \theta^*)) X_i$ , and we have

$$G(\theta^*) = 0 \quad \text{and} \quad G(\hat{\theta}) = \sum_{i=1}^n \epsilon_i X_i, \quad (16)$$

where the noise  $\epsilon_i$  is defined in (1). For convenience, define  $Z := G(\hat{\theta}) = \sum_{i=1}^n \epsilon_i X_i$ .

**Step 1: Consistency of  $\hat{\theta}$ .** We first prove the consistency of  $\hat{\theta}$ . For any  $\theta_1, \theta_2 \in \mathbb{R}^d$ , mean value theorem implies that there exists some  $\bar{\theta} = v\theta_1 + (1-v)\theta_2$  with  $0 < v < 1$ , such that

$$G(\theta_1) - G(\theta_2) = \left[ \sum_{i=1}^n \dot{\mu}(X_i' \bar{\theta}) X_i X_i' \right] (\theta_1 - \theta_2) := F(\bar{\theta})(\theta_1 - \theta_2) \quad (17)$$

Since  $\dot{\mu} > 0$  and  $\lambda_{\min}(V) > 0$ , we have

$$(\theta_1 - \theta_2)' (G(\theta_1) - G(\theta_2)) \geq (\theta_1 - \theta_2)' (\kappa V) (\theta_1 - \theta_2) > 0$$

for any  $\theta_1 \neq \theta_2$ . Hence,  $G(\theta)$  is an injection from  $\mathbb{R}^d$  to  $\mathbb{R}^d$ , and so  $G^{-1}$  is a well-defined function. Consequently, (15) has a unique solution  $\hat{\theta} = G^{-1}(Z)$ .

Let us consider an  $\eta$ -neighborhood of  $\theta^*$ ,  $\mathbb{B}_\eta := \{\theta : \|\theta - \theta^*\| \leq \eta\}$ , where  $\eta > 0$  is a constant that will be specified later. Note that  $\mathbb{B}_\eta$  is a convex set, thus  $\bar{\theta} \in \mathbb{B}_\eta$  as long as  $\theta_1, \theta_2 \in \mathbb{B}_\eta$ . Define  $\kappa_\eta := \inf_{\theta \in \mathbb{B}_\eta} \dot{\mu}(x' \theta) > 0$ . From (17), for any  $\theta \in \mathbb{B}_\eta$ ,

$$\begin{aligned} \|G(\theta)\|_{V^{-1}}^2 &= \|G(\theta) - G(\theta^*)\|_{V^{-1}}^2 \\ &= (\theta - \theta^*)' F(\bar{\theta}) V^{-1} F(\bar{\theta}) (\theta - \theta^*) \\ &\geq \kappa_\eta^2 \lambda_{\min}(V) \|\theta - \theta^*\|^2, \end{aligned}$$

where the last inequality is due to the fact that  $F(\bar{\theta}) \succeq \kappa_\eta V$ .

On the other hand, Lemma A of [Chen et al. \(1999\)](#) implies that

$$\left\{ \theta : \|G(\theta)\|_{V^{-1}} \leq \kappa_\eta \eta \sqrt{\lambda_{\min}(V)} \right\} \subset \mathbb{B}_\eta.$$

Now it remains to upper bound  $\|Z\|_{V^{-1}} = \|G(\hat{\theta})\|_{V^{-1}}$  to ensure  $\hat{\theta} \in \mathbb{B}_\eta$ . To do so, we need the following technical lemma, whose proof is deferred to Section C.

**Lemma 7.** Recall  $\sigma$  which is the constant in (2). For any  $\delta > 0$ , define the following event:

$$\mathcal{E}_G := \left\{ \|Z\|_{V^{-1}} \leq 4\sigma \sqrt{d + \log(1/\delta)} \right\}.$$

Then,  $\mathcal{E}_G$  holds with probability at least  $1 - \delta$ .

Suppose  $\mathcal{E}_G$  holds for the rest of the proof. Then,  $\eta \geq \frac{4\sigma}{\kappa_\eta} \sqrt{\frac{d + \log(1/\delta)}{\lambda_{\min}(V)}}$  implies  $\|\hat{\theta}_t - \theta\| \leq \eta$ . Since  $\kappa = \kappa_1$ , we have  $\kappa_\eta \geq \kappa$  as long as  $\eta \leq 1$ . Thus, we have

$$\|\hat{\theta} - \theta\| \leq \frac{4\sigma}{\kappa} \sqrt{\frac{d + \log(1/\delta)}{\lambda_{\min}(V)}} \leq 1, \quad (18)$$

when  $\lambda_{\min}(V) \geq 16\sigma^2 [d + \log(1/\delta)] / \kappa^2$ .

**Step 2: Normality of  $\hat{\theta}$ .** Now, we are ready to precede to prove the normality result. The following assumes  $\mathcal{E}_G$  holds (which is high-probability event, according to Lemma 7).

Define  $\Delta := \hat{\theta} - \theta^*$ . It follows from (17) that there exists a  $v \in [0, 1]$  such that

$$Z = G(\hat{\theta}) - G(\theta^*) = (H + E)\Delta,$$

where  $\tilde{\theta} := v\theta^* + (1-v)\hat{\theta}$ ,  $H := F(\theta^*) = \sum_{i=1}^n \dot{\mu}(X_i' \theta^*) X_i X_i'$  and  $E := F(\tilde{\theta}) - F(\theta^*)$ . Intuitively, when  $\hat{\theta}$  and  $\theta^*$  are close, elements in  $E$  are small. By the mean value theorem,

$$E = \sum_{i=1}^n \left( \dot{\mu}(X_i' \tilde{\theta}) - \dot{\mu}(X_i' \theta^*) \right) X_i X_i' = \sum_{i=1}^n \ddot{\mu}(r_i) X_i' \Delta X_i X_i'$$

for some  $r_i \in \mathbb{R}$ . Since  $\ddot{\mu} \leq M_\mu$  and  $v \in [0, 1]$ , for any  $x \in \mathbb{R}^d \setminus \{0\}$ , we have

$$\begin{aligned} x' H^{-1/2} E H^{-1/2} x &= (1-v) \sum_{i=1}^n \ddot{\mu}(r_i) X_i' \Delta \left\| x' H^{-1/2} X_i \right\|^2 \\ &\leq \sum_{i=1}^n M_\mu \|X_i\| \|\Delta\| \left\| x' H^{-1/2} X_i \right\|^2 \\ &\leq M_\mu \|\Delta\| \left( x' H^{-1/2} \left( \sum_{i=1}^n X_i X_i' \right) H^{-1/2} x \right) \\ &\leq \frac{M_\mu}{\kappa} \|\Delta\| \|x\|^2, \end{aligned}$$

where we have used the assumption that  $\|X_i\| \leq 1$  for the second inequality. Therefore,

$$\left\| H^{-1/2} E H^{-1/2} \right\| \leq \frac{M_\mu}{\kappa} \|\Delta\| \leq \frac{4M_\mu \sigma}{\kappa^2} \sqrt{\frac{d + \log(1/\delta)}{\lambda_{\min}(V)}}. \quad (19)$$

When  $\lambda_{\min}(V) \geq 64M_\mu^2 \sigma^2 (d + \log(1/\delta)) / \kappa^4$ , we have

$$\left\| H^{-1/2} E H^{-1/2} \right\| \leq 1/2. \quad (20)$$

Now we are ready to prove the theorem. For any  $x \in \mathbb{R}^d$ ,

$$x'(\hat{\theta} - \theta^*) = x'(H + E)^{-1} Z = x' H^{-1} Z - x' H^{-1} E (H + E)^{-1} Z. \quad (21)$$

Note that the matrix  $(H + E)$  is nonsingular, so its inversion exists.

For the first term,  $\{\epsilon_i\}$  are sub-Gaussian random variables with sub-Gaussian parameter  $\sigma$ . Define

$$D := [X_1, X_2, \dots, X_n]' \in \mathbb{R}^{n \times d}$$

to be the design matrix. Hoeffding inequality gives

$$\mathbb{P}\{|x'H^{-1}Z| \geq t\} \leq 2 \exp \left\{ -\frac{t^2}{2\sigma^2 \|x'H^{-1}D'\|^2} \right\}. \quad (22)$$

Since  $H \succeq \kappa V = \kappa D'D$ , we have

$$\|x'H^{-1}D'\|^2 = x'H^{-1}D'DH^{-1}x \leq \frac{1}{\kappa^2} x'V^{-1}x = \frac{1}{\kappa^2} \|x\|_{V^{-1}}^2,$$

so (22) implies

$$\mathbb{P}\{|x'H^{-1}Z| \geq t\} \leq 2 \exp \left\{ -\frac{t^2 \kappa^2}{2\sigma^2 \|x\|_{V^{-1}}^2} \right\}.$$

Let the right-hand side be  $2\delta$  and solve for  $t$ , we obtain that with probability at least  $1 - 2\delta$ ,

$$|x'H^{-1}Z| \leq \frac{\sqrt{2}\sigma}{\kappa} \sqrt{\log(1/\delta)} \|x\|_{V^{-1}}. \quad (23)$$

For the second term,

$$\begin{aligned} |x'H^{-1}E(H+E)^{-1}Z| &\leq \|x\|_{H^{-1}} \left\| H^{-1/2}E(H+E)^{-1}Z \right\| \\ &\leq \|x\|_{H^{-1}} \left\| H^{-1/2}E(H+E)^{-1}H^{1/2} \right\| \|Z\|_{H^{-1}} \\ &\leq \frac{1}{\kappa} \|x\|_{V^{-1}} \left\| H^{-1/2}E(H+E)^{-1}H^{1/2} \right\| \|Z\|_{V^{-1}}, \end{aligned} \quad (24)$$

where the last inequality is due to the fact that  $H \succeq \kappa V$ . Since  $(H+E)^{-1} = H^{-1} - H^{-1}E(H+E)^{-1}$ , we have

$$\begin{aligned} \left\| H^{-1/2}E(H+E)^{-1}H^{1/2} \right\| &= \left\| H^{-1/2}E(H^{-1} - H^{-1}E(H+E)^{-1})H^{1/2} \right\| \\ &= \left\| H^{-1/2}EH^{-1/2} + H^{-1/2}EH^{-1}E(H+E)^{-1}H^{1/2} \right\| \\ &\leq \left\| H^{-1/2}EH^{-1/2} \right\| + \left\| H^{-1/2}EH^{-1/2} \right\| \left\| H^{-1/2}E(H+E)^{-1}H^{1/2} \right\|. \end{aligned}$$

By solving this inequality, we get

$$\left\| H^{-1/2}E(H+E)^{-1}H^{1/2} \right\| \leq \frac{\left\| H^{-1/2}EH^{-1/2} \right\|}{1 - \left\| H^{-1/2}EH^{-1/2} \right\|} \leq 2 \left\| H^{-1/2}EH^{-1/2} \right\| \leq \frac{8M_\mu\sigma}{\kappa^2} \sqrt{\frac{d + \log(1/\delta)}{\lambda_{\min}(V)}},$$

where we have used (20) and (19) in the second and third inequalities, respectively. Combining it with (24) and the bound in  $\mathcal{E}_G$ , we have

$$|x'H^{-1}E(H+E)^{-1}Z| \leq \frac{32M_\mu\sigma^2}{\kappa^3} \frac{d + \log(1/\delta)}{\sqrt{\lambda_{\min}(V)}} \|x\|_{V^{-1}}. \quad (25)$$

From (21), (23) and (25), one can see that (5) holds as long as the lower bound (4) for  $\lambda_{\min}(V)$  holds. Finally, an application of a union bound on two small-probability events (given in Lemma 7 and (23), respectively) asserts that (5) holds with probability at least  $1 - 3\delta$ .

## B. Proof of Proposition 1

In the following, for simplicity, we will drop the subscript  $n$  when there is no ambiguity. Therefore,  $V_n$  is denoted  $V$  and so on.

Let  $X$  be a random vector drawn from the distribution  $\nu$ . Define  $Z := \Sigma^{-1/2}X$ . Then  $Z$  is isotropic, namely,  $\mathbb{E}[ZZ'] = \mathbf{I}_d$ . Define  $U = \sum_{t=1}^n Z_t Z_t' = \Sigma^{-1/2}V\Sigma^{-1/2}$ . From Lemma 1, we have that, for any  $t$ , with probability at least  $1 - 2\exp(-C_2 t^2)$ ,

$$\lambda_{\min}(U) \geq n - C_1 \sigma^2 \sqrt{nd} - \sigma^2 t \sqrt{n}.$$

where  $\sigma$  is the sub-Gaussian parameter of  $Z$ , which is upper-bounded by  $\|\Sigma^{-1/2}\| = \lambda_{\min}^{-1/2}(\Sigma)$  (see, e.g., Vershynin (2012)). We thus can rewrite the above inequality (which holds with probability  $1 - \delta$ ) as

$$\lambda_{\min}(U) \geq n - \lambda_{\min}^{-1}(\Sigma) \left( C_1 \sigma^2 \sqrt{nd} + t \sqrt{n} \right).$$

We now bound the minimum eigenvalue of  $V$ , as follows:

$$\begin{aligned} \lambda_{\min}(V) &= \min_{x \in \mathbb{B}^d} x' V x \\ &= \min_{x \in \mathbb{B}^d} x' \Sigma^{1/2} U \Sigma^{1/2} x \\ &\geq \lambda_{\min}(U) \min_{x \in \mathbb{B}^d} x' \Sigma x \\ &= \lambda_{\min}(U) \lambda_{\min}(\Sigma) \\ &\geq \lambda_{\min}(\Sigma) \left( n - \lambda_{\min}^{-1}(\Sigma) (C_1 \sigma^2 \sqrt{nd} + t \sqrt{n}) \right) \\ &= \lambda_{\min}(\Sigma) n - C_1 \sqrt{nd} - C_2 \sqrt{n \log(1/\delta)}. \end{aligned}$$

Finally, it can be verified (Lemma 9) that the last expression above is no less than  $B$  as long as

$$n \geq \left( \frac{C_1 \sqrt{d} + C_2 \sqrt{\log(1/\delta)}}{\lambda_{\min}(\Sigma)} \right)^2 + \frac{2B}{\lambda_{\min}(\Sigma)},$$

finishing the proof.

## C. Technical Lemmas and Proofs

### C.1. Proof of Lemma 7

Noting that

$$\|Z\|_{V^{-1}} = \|V^{-1/2}Z\|_2 = \sup_{\|a\|_2 \leq 1} \langle a, V^{-1/2}Z \rangle,$$

let  $\hat{\mathbb{B}}$  be a  $1/2$ -net of the unit ball  $\mathbb{B}^d$ . Then  $|\hat{\mathbb{B}}| \leq 6^d$  (Pollard, 1990, Lemma 4.1), and for any  $x \in \mathbb{B}^d$ , there is a  $\hat{x} \in \hat{\mathbb{B}}$  such that  $\|x - \hat{x}\| \leq 1/2$ . Consequently,

$$\begin{aligned} \langle x, V^{-1/2}Z \rangle &= \langle \hat{x}, V^{-1/2}Z \rangle + \langle x - \hat{x}, V^{-1/2}Z \rangle \\ &= \langle \hat{x}, V^{-1/2}Z \rangle + \|x - \hat{x}\| \left\langle \frac{x - \hat{x}}{\|x - \hat{x}\|}, V^{-1/2}Z \right\rangle \\ &\leq \langle \hat{x}, V^{-1/2}Z \rangle + \frac{1}{2} \sup_{z \in \mathbb{B}^d} \langle z, V^{-1/2}Z \rangle. \end{aligned}$$

Taking supremum on both sides, we get

$$\sup_{x \in \mathbb{B}^d} \langle x, V^{-1/2}Z \rangle \leq 2 \max_{\hat{x} \in \hat{\mathbb{B}}} \langle \hat{x}, V^{-1/2}Z \rangle.$$

Then a union bound argument implies

$$\begin{aligned}
 \mathbb{P}\{\|Z\|_{V^{-1}} > t\} &\leq \mathbb{P}\left\{\max_{\hat{x} \in \hat{\mathbb{B}}}\langle \hat{x}, V^{-1/2}Z \rangle > t/2\right\} \\
 &\leq \sum_{\hat{x} \in \hat{\mathbb{B}}} \mathbb{P}\left\{\langle \hat{x}, V^{-1/2}Z \rangle > t/2\right\} \\
 &\leq \sum_{\hat{x} \in \hat{\mathbb{B}}} \exp\left\{-\frac{t^2}{8\sigma^2 \|\hat{x}'V^{-1/2}X'\|^2}\right\} \\
 &\leq \exp\{-t^2/(8\sigma^2) + d \log 6\},
 \end{aligned}$$

where we have used Hoeffding's inequality for the third inequality and  $|\hat{\mathbb{B}}| \leq 6^d$  for the last inequality. A choice of  $t = 4\sigma\sqrt{d + \log(1/\delta)}$  completes the proof.

### C.2. Proof of Lemma 2

By Abbasi-Yadkori et al. (2011, Lemma 11), we have

$$\sum_{t=m+1}^{m+n} \|X_t\|_{V_t^{-1}}^2 \leq 2 \log \frac{\det V_{m+n+1}}{\det V_{m+1}} \leq 2d \log \left( \frac{\text{tr}(V_{m+1}) + n}{d} \right) - 2 \log \det V_{m+1}.$$

Note that  $\text{tr}(V_{m+1}) = \sum_{t=1}^m \text{tr}(X_t X_t') = \sum_{t=1}^m \|X_t\|^2 \leq m$  and that  $\det V_{m+1} = \prod_{i=1}^d \lambda_i \geq \lambda_{\min}^d(V_{m+1}) \geq 1$ , where  $\{\lambda_i\}$  are the eigenvalues of  $V_{m+1}$ . Applying Cauchy-Schwartz inequality yields

$$\sum_{t=m+1}^{m+n} \|X_t\|_{V_t^{-1}} \leq \sqrt{n \sum_{t=m+1}^{m+n} \|X_t\|_{V_t^{-1}}^2} \leq \sqrt{2nd \log \left( \frac{n+m}{d} \right)}.$$

### C.3. Proof of Lemma 3

Define  $G_t(\theta) = \sum_{i=1}^{t-1} (\mu(X_i' \theta) - \mu(X_i' \theta^*)) X_i$  and  $Z_t = \sum_{i=1}^{t-1} \epsilon_i X_i$ . Following the same argument as in the proof of Theorem 1, we have  $G_t(\hat{\theta}_t) = Z_t$  and

$$\|G_t(\theta)\|_{V_t^{-1}}^2 \geq \kappa^2 \|\theta - \theta^*\|_{V_t}^2 \quad (26)$$

for any  $\theta \in \{\theta : \|\theta - \theta^*\| \leq 1\}$ . Combining (26) with the following lemma and the equality  $Z_t = G_t(\hat{\theta}_t)$  completes the proof.

**Lemma 8.** *Suppose there is an integer  $m$  such that  $\lambda_{\min}(V_m) \geq 1$ , then for any  $\delta \in (0, 1)$ , with probability at least  $1 - \delta$ , for all  $t > m$ ,*

$$\|Z_t\|_{V_t^{-1}}^2 \leq 4\sigma^2 \left( \frac{d}{2} \log(1 + 2t/d) + \log(1/\delta) \right).$$

*Proof.* For convenience, fix  $t$  such that  $t > m$ , and denote  $V_t$  and  $Z_t$  by  $V$  and  $Z$ , respectively. Furthermore, define  $\bar{V} := V + \lambda I$  and let  $\mathbf{1}$  be the vector of all 1s. It is easy to observe that

$$\|Z\|_{V^{-1}}^2 = \|Z\|_{\bar{V}^{-1}}^2 + Z'(V^{-1} - \bar{V}^{-1})Z. \quad (27)$$

We start with bounding the second term. The ShermanMorrison formula gives

$$\bar{V}^{-1} = V^{-1} - \frac{\lambda V^{-2}}{1 + \lambda \mathbf{1}' V^{-1} \mathbf{1}}.$$

Since  $\mathbf{1}' V^{-1} \mathbf{1} \geq 0$ , the above implies that

$$\begin{aligned}
 0 &\leq Z'(V^{-1} - \bar{V}^{-1})Z \\
 &\leq \lambda Z' V^{-2} Z \\
 &\leq \lambda \|V^{-1}\| \|Z\|_{V^{-1}}^2 \\
 &= \frac{\lambda}{\lambda_{\min}(V)} \|Z\|_{V^{-1}}^2.
 \end{aligned}$$

Since  $\lambda_{\min}(V) \geq \lambda_{\min}(V_m) \geq 1$ , we now have

$$0 \leq Z'(V^{-1} - \bar{V}^{-1})Z \leq \lambda \|Z\|_{\bar{V}^{-1}}^2.$$

The above inequality together with (27) implies that

$$\|Z\|_{\bar{V}^{-1}}^2 \leq (1 - \lambda)^{-1} \|Z\|_{\bar{V}^{-1}}^2.$$

The proof can be finished by applying Theorem 1 and Lemma 10 from Abbasi-Yadkori et al. (2011) to bound  $\|Z\|_{\bar{V}^{-1}}^2$ , using  $\lambda = 1/2$ .  $\square$

#### C.4. Proof of Lemma 6

We will prove the first part of the lemma by induction. It is easy to check the lemma holds for  $s = 1$ . Suppose we have  $a_t^* \in A_s$  and we want to prove  $a_t^* \in A_{s+1}$ . Since the algorithm proceeds to stage  $s + 1$ , we know from step 2b that

$$|m_{t,a}^{(s)} - x'_{t,a}\theta^*| \leq w_{t,a}^{(s)} \leq 2^{-s}$$

for all  $a \in A_s$ . Specially, it holds for  $a = a_t^*$  because  $a_t^* \in A_s$  by our induction step. Then the optimality of  $a_t^*$  implies

$$m_{t,a_t^*}^{(s)} \geq x'_{t,a_t^*}\theta^* - 2^{-s} \geq x'_{t,a}\theta^* - 2^{-s} \geq m_{t,a}^{(s)} - 2 \cdot 2^{-s}$$

for all  $a \in A_s$ . Thus we have  $a_t^* \in A_{s+1}$  according to step 2d.

Suppose  $a_t$  is selected at stage  $s_t$  in step 2b. If  $s_t = 1$ , obviously the lemma holds because  $0 \leq \mu(x) \leq 1$  for all  $x$ . If  $s_t > 1$ , since we have proved  $a_t^* \in A_{s_t}$ , again step 2b at stage  $s_t - 1$  implies

$$|m_{t,a}^{(s_t-1)} - x'_{t,a}\theta^*| \leq 2^{-s_t+1}$$

for  $a = a_t$  and  $a = a_t^*$ . Step 2d at stage  $s_t - 1$  implies

$$m_{t,a_t^*}^{(s_t-1)} - m_{t,a_t}^{(s_t-1)} \leq 2 \cdot 2^{-s_t+1}.$$

Combining above two inequalities, we get

$$x'_{t,a_t}\theta^* \geq m_{t,a_t}^{(s_t-1)} - 2^{-s_t+1} \geq m_{t,a_t^*}^{(s_t-1)} - 3 \cdot 2^{-s_t+1} \geq x'_{t,a_t^*}\theta^* - 4 \cdot 2^{-s_t+1}.$$

When  $a_t$  is selected in step 2c, since  $m_{t,a_t}^{(s_t)} \geq m_{t,a_t^*}^{(s_t)}$ , we have

$$x'_{t,a_t}\theta^* \geq m_{t,a_t}^{(s_t)} - 1/\sqrt{T} \geq m_{t,a_t^*}^{(s_t)} - 1/\sqrt{T} \geq x'_{t,a_t^*}\theta^* - 2/\sqrt{T}.$$

Using the fact that  $\mu(x_1) - \mu(x_2) \leq L_\mu(x_1 - x_2)$  for  $x_1 \geq x_2$ , we will get the desired result.

#### C.5. Proof of Lemma 9

**Lemma 9.** *Let  $a$  and  $b$  be two positive constants. If  $m \geq a^2 + 2b$ , then  $m - a\sqrt{m} - b \geq 0$ .*

*Proof.* The function  $t \mapsto t^2 - at - b$  is monotonically increasing for  $t \geq a/2$ . Since  $m \geq a^2 + 2b$ , we have  $\sqrt{m} \geq a/2$ , so

$$\begin{aligned} m - a\sqrt{m} - b &\geq a^2 + 2b - a\sqrt{a^2 + 2b} - b \\ &\geq a^2 + b - a\sqrt{a^2 + 2b + b^2/a^2} \\ &= a^2 + b - a\sqrt{(a + b/a)^2} \\ &= a^2 + b - a(a + b/a) \\ &= 0. \end{aligned}$$

$\square$
